# Supplementary material for: Biomimetic Bilayered Scaffolds for Tissue Engineering: From Current Design Strategies to Medical Applications
Source: PubMed Central journal article supplement — Adv Healthc Mater. 2023 Mar 8;12(17):2203115. doi: 10.1002/adhm.202203115 (PMC11469754; doi:10.1002/adhm.202203115), 2023-03-08
Supplement: ADHM-12-2203115-s001.pdf [file ADHM-12-2203115-s001.pdf]

# ADVANCED HEALTHCARE MATERIALS

## Supporting Information

for *Adv. Healthcare Mater.*, DOI 10.1002/adhm.202203115

Biomimetic Bilayered Scaffolds for Tissue Engineering: From Current Design Strategies to Medical Applications

*Christelle Bertsch, H el ene Mar echal, Varvara Gribova, Benjamin L evy, Christian Debry, Philippe Lavalley\* and L ea Fath*

# **Biomimetic Bilayered Scaffolds For Tissue Engineering: From Current Design Strategies To Medical Applications**

Christelle Bertsch, H  l  ne Mar  chal, Varvara Gribova, Benjamin L  vy, Christian Debry, Philippe Lavalle, L  a Fath

## Supporting Information

### List of abbreviations

|                   |                                              |
|-------------------|----------------------------------------------|
| 2D                | two-dimensional                              |
| 3D                | three-dimensional                            |
| ACP               | amorphous calcium phosphates                 |
| ADMSCs            | human adipose-derived multipotent stem cells |
| AgSD              | silver sulphadiazine                         |
| AJP               | aerosol jet printing                         |
| BC                | bacterial cellulose                          |
| BCP               | biphasic calcium phosphates                  |
| BG                | bioactive glass                              |
| BMP-2             | bone morphogenetic protein 2                 |
| BMSCs             | bone marrow stromal cells                    |
| CAD               | computer-aided design                        |
| CaP               | calcium phosphate                            |
| CaSO <sub>4</sub> | calcium sulfate                              |
| CGF               | concentrated growth factor                   |
| CNF               | cellulose nanofiber                          |
| Col               | collagen                                     |
| CS                | chitosan                                     |
| DIPS              | diffusion induced phase separation           |
| DLP               | digital laser printing                       |
| DN                | double network                               |
| ECM               | extracellular matrix                         |
| ECs               | endothelial cells                            |
| EDC               | adipose tissue-derived                       |
| FDM               | fused deposition modelling                   |
| GAGs              | glycosaminoglycans                           |
| HA                | hyaluronic acid                              |
| HACs              | human articular chondrocytes                 |
| HAP               | hydroxyapatite                               |
| HAX               | cross-linked hyaluronic acid                 |
| hBMSCs            | human bone marrow-derived stem cells         |
| HDFCs             | human dental follicle stem cells             |
| HLC               | human-like-collagen                          |
| HMECs             | human microvascular endothelial cells        |
| HOBs              | human osteoblasts                            |

|                |                                                      |
|----------------|------------------------------------------------------|
| HP             | heparin                                              |
| HRP            | horseradish peroxidase                               |
| HUCMSC         | human umbilical cord mesenchymal stem cells          |
| HUVECs         | human umbilical vein endothelial cells               |
| IJP            | ink jet printing                                     |
| IMC            | intrafibrillarly mineralized collagen                |
| KGN            | kartongenin                                          |
| Mg             | magnesium                                            |
| MSCs           | mesenchymal stem cells                               |
| OCD            | osteocondral defect                                  |
| OCTE           | osteocondral tissue engineering                      |
| OCN            | osteocalcin                                          |
| OPN            | osteopontin                                          |
| P(LLA-CL)      | poly(L-lactide-co- $\epsilon$ -caprolactone)         |
| PA6            | polyamide6                                           |
| PCL            | $\epsilon$ -poly(caprolactone)                       |
| PEO            | polyethylene oxide                                   |
| PET            | polyethylene terephthalate                           |
| PGA            | polyglycolide                                        |
| PGCL           | poly(glycolide-co- $\epsilon$ -caprolactone)         |
| PGS            | poly(glycerol sebacate)                              |
| PLA            | poly(lactic acid)                                    |
| PLCL           | poly(L-lactide-co- $\epsilon$ -caprolactone)         |
| PLGA           | poly(lactic-co-glycolic acid)                        |
| PLL            | poly-L-lysine                                        |
| PLLA           | poly(L-lactic acid)                                  |
| PS             | potato starch                                        |
| PTFE           | poly(lactic-co-glycolic) acid                        |
| PU             | polytetrafluoroethylene                              |
| PVA            | polyurethane                                         |
| RGD            | polyvinyl alcohol                                    |
| rhVEGF         | recombinant human vascular endothelial growth factor |
| RUNX2          | runt-related transcription factor 2                  |
| SF             | silk fibroin                                         |
| SLA            | stereolithography                                    |
| SLS            | selective laser sintering                            |
| SM             | silymarin                                            |
| SMCs           | smooth mesenchymal cells                             |
| SOX9           | SRY-box transcription factor 9                       |
| Sr             | strontium                                            |
| TCP            | tricalcium phosphate                                 |
| TE             | tissue engineering                                   |
| TEVGs          | tissue-engineered vascular grafts                    |
| TGF- $\beta$ 1 | transforming growth factor- $\beta$ 1                |
| TIPS           | thermally induced separation method                  |
| VSMCs          | vascular smooth muscle cells                         |
| Zn             | zinc                                                 |
| $\beta$ -TCP   | $\beta$ -tricalcium phosphate                        |
